# Supplementary material
Source: PubMed Central journal article supplement (PMC6359974)

Supplementary Figure 9

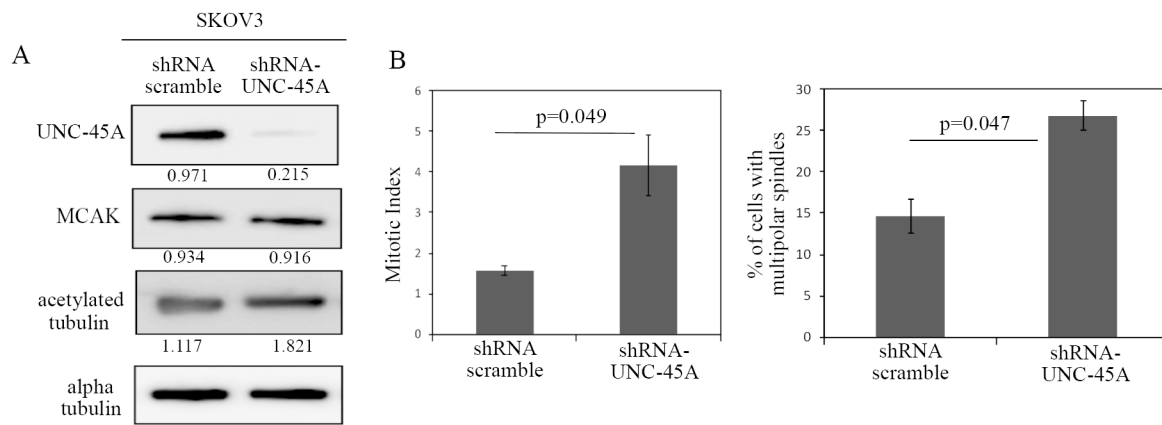

Supplement: NIHMS1509277-supplement-10.pdf [file NIHMS1509277-supplement-10.pdf]

Supplementary Figure 1

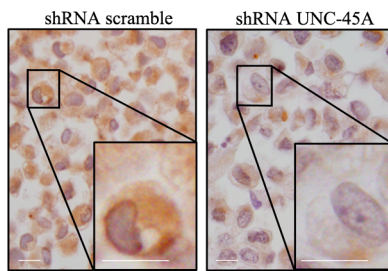

Supplement: NIHMS1509277-supplement-2.pdf [file NIHMS1509277-supplement-2.pdf]

Supplementary Figure 2

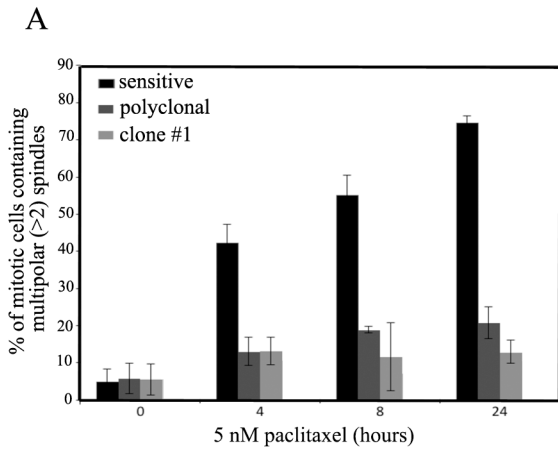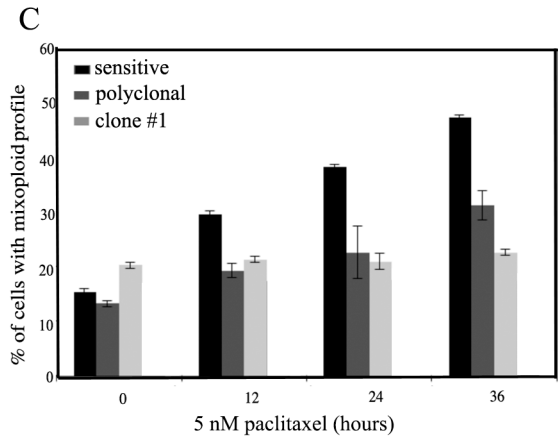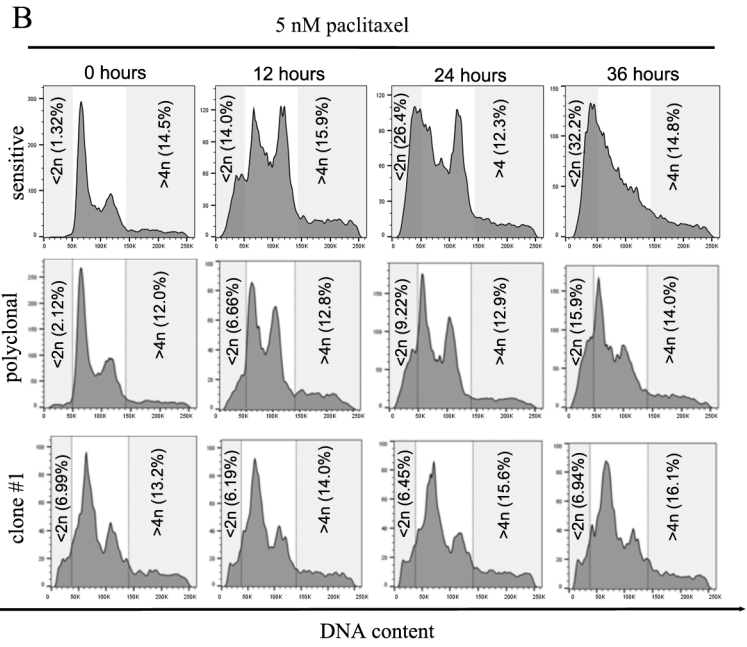

Supplement: NIHMS1509277-supplement-3.pdf [file NIHMS1509277-supplement-3.pdf]

Supplementary Figure 3

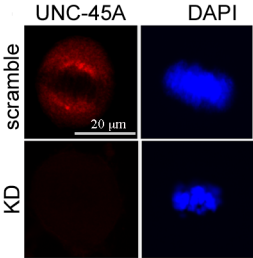

Supplement: NIHMS1509277-supplement-4.pdf [file NIHMS1509277-supplement-4.pdf]

### Supplementary Figure 4

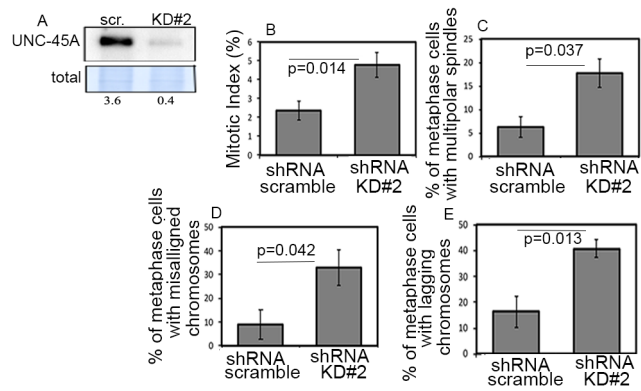

Supplement: NIHMS1509277-supplement-5.pdf [file NIHMS1509277-supplement-5.pdf]

Supplementary Figure 5

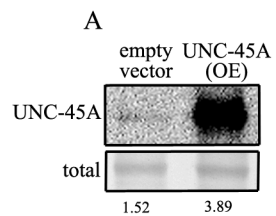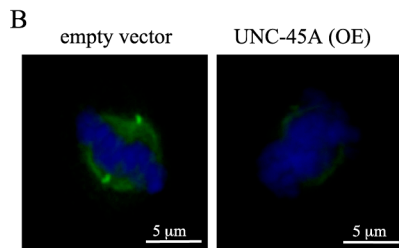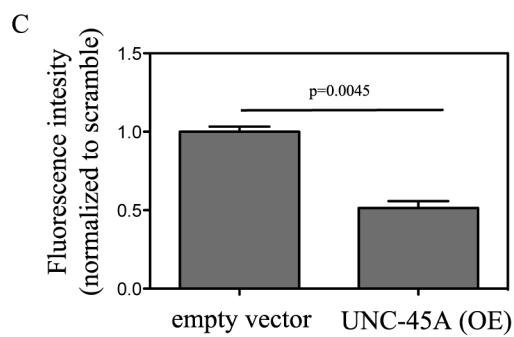

Supplement: NIHMS1509277-supplement-6.pdf [file NIHMS1509277-supplement-6.pdf]

Supplementary Figure 6

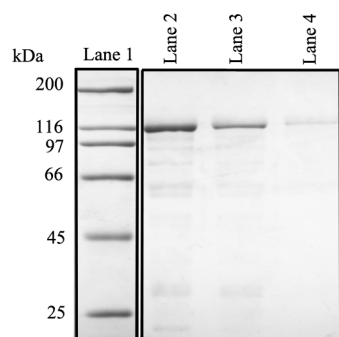

Supplement: NIHMS1509277-supplement-7.pdf [file NIHMS1509277-supplement-7.pdf]

Supplementary Figure 7

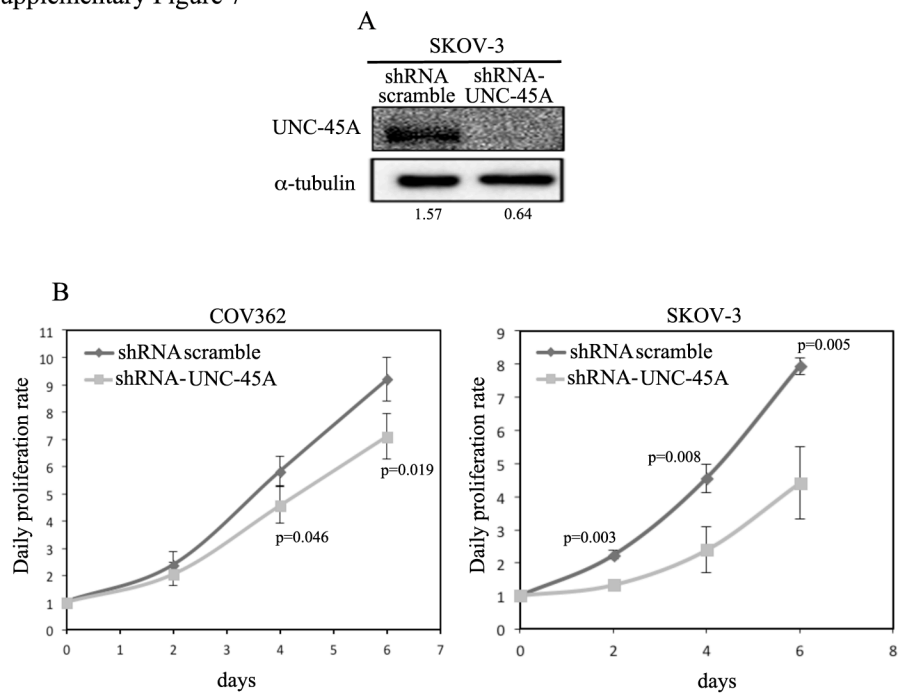

Supplement: NIHMS1509277-supplement-8.pdf [file NIHMS1509277-supplement-8.pdf]

Supplementary Figure 8

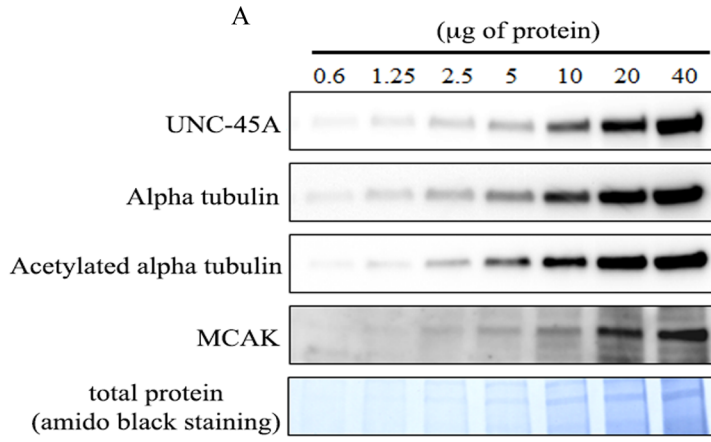

**B**

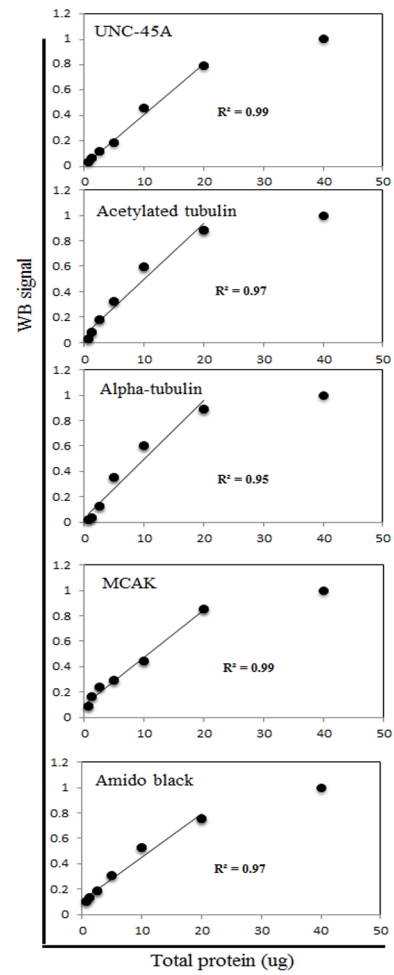

Supplement: NIHMS1509277-supplement-9.pdf [file NIHMS1509277-supplement-9.pdf]
